# Supplementary material
Source: PubMed Central journal article supplement (PMC4317649)
Supplement: 3aad4859ad16593e1a58e687273a78b1_genetics.114.167916-6.pdf [file 3aad4859ad16593e1a58e687273a78b1_genetics.114.167916-6.pdf]

## Table S3

Table S3: : **Marker-based estimation of heritability: width and coverage confidence intervals obtained from the individual plant data and the genotypic means.** Results for broad sense heritability intervals are reported for comparison. We simulated 5000 traits, for random samples of 200 accessions drawn from the Swedish regmap (top) and French (bottom). 20 unlinked QTLs were simulated, which explained 50 percent of the genetic variance. The simulated heritability was 0.2, 0.5 and 0.8.

|                              | coverage | interval width |
|------------------------------|----------|----------------|
| Swedish regmap               |          |                |
| $h^2 = 0.2$                  |          |                |
| broad-sense                  | 0.912    | 0.178          |
| replicates (standard)        | 0.933    | 0.188          |
| replicates (log-transformed) | 0.961    | 0.189          |
| means (standard)             | 0.899    | 0.381          |
| means (log-transformed)      | 0.968    | 0.405          |
| $h^2 = 0.5$                  |          |                |
| broad-sense                  | 0.864    | 0.160          |
| replicates (standard)        | 0.946    | 0.176          |
| replicates (log-transformed) | 0.950    | 0.175          |
| means (standard)             | 0.921    | 0.594          |
| means (log-transformed)      | 0.970    | 0.560          |
| $h^2 = 0.8$                  |          |                |
| broad-sense                  | 0.823    | 0.085          |
| replicates (standard)        | 0.945    | 0.088          |
| replicates (log-transformed) | 0.947    | 0.088          |
| means (standard)             | 0.960    | 0.635          |
| means (log-transformed)      | 0.938    | 0.748          |
| French regmap                |          |                |
| $h^2 = 0.2$                  |          |                |
| broad-sense                  | 0.929    | 0.178          |
| replicates (standard)        | 0.941    | 0.184          |
| replicates (log-transformed) | 0.962    | 0.185          |
| means (standard)             | 0.898    | 0.396          |
| means (log-transformed)      | 0.960    | 0.431          |
| $h^2 = 0.5$                  |          |                |
| broad-sense                  | 0.898    | 0.160          |
| replicates (standard)        | 0.953    | 0.173          |
| replicates (log-transformed) | 0.956    | 0.171          |
| means (standard)             | 0.927    | 0.619          |
| means (log-transformed)      | 0.976    | 0.585          |
| $h^2 = 0.8$                  |          |                |
| broad-sense                  | 0.866    | 0.084          |
| replicates (standard)        | 0.947    | 0.088          |
| replicates (log-transformed) | 0.947    | 0.088          |
| means (standard)             | 0.966    | 0.652          |
| means (log-transformed)      | 0.948    | 0.767          |
