# Supplementary material
Source: PubMed Central journal article supplement (PMC4317649)
Supplement: 14eecf28a7f552ba88693fe9952442da_genetics.114.167916-14.pdf [file 14eecf28a7f552ba88693fe9952442da_genetics.114.167916-14.pdf]

Figure S2: histograms of the off-diagonal identity-by-state coefficients, for 4 sub-populations of the regmap.

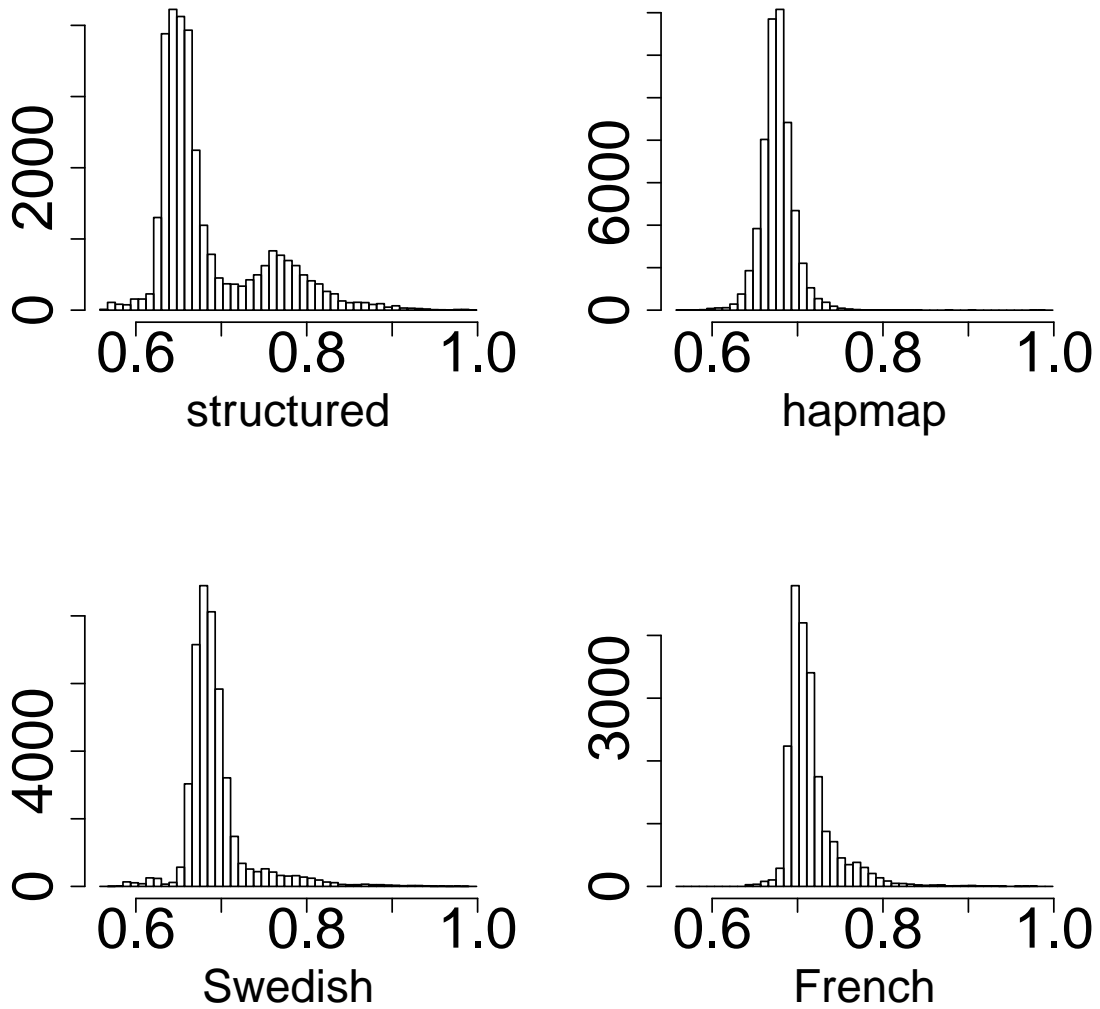

Figure S2 : Off-diagonal identity-by-state kinship coefficients, for 4 sub-populations of the regmap.
