# Supplementary material
Source: PubMed Central journal article supplement (PMC4317649)
Supplement: 16f3db3a3283f344ff0c8fddd4a6166b_genetics.114.167916-10.pdf [file 16f3db3a3283f344ff0c8fddd4a6166b_genetics.114.167916-10.pdf]

Figure S6

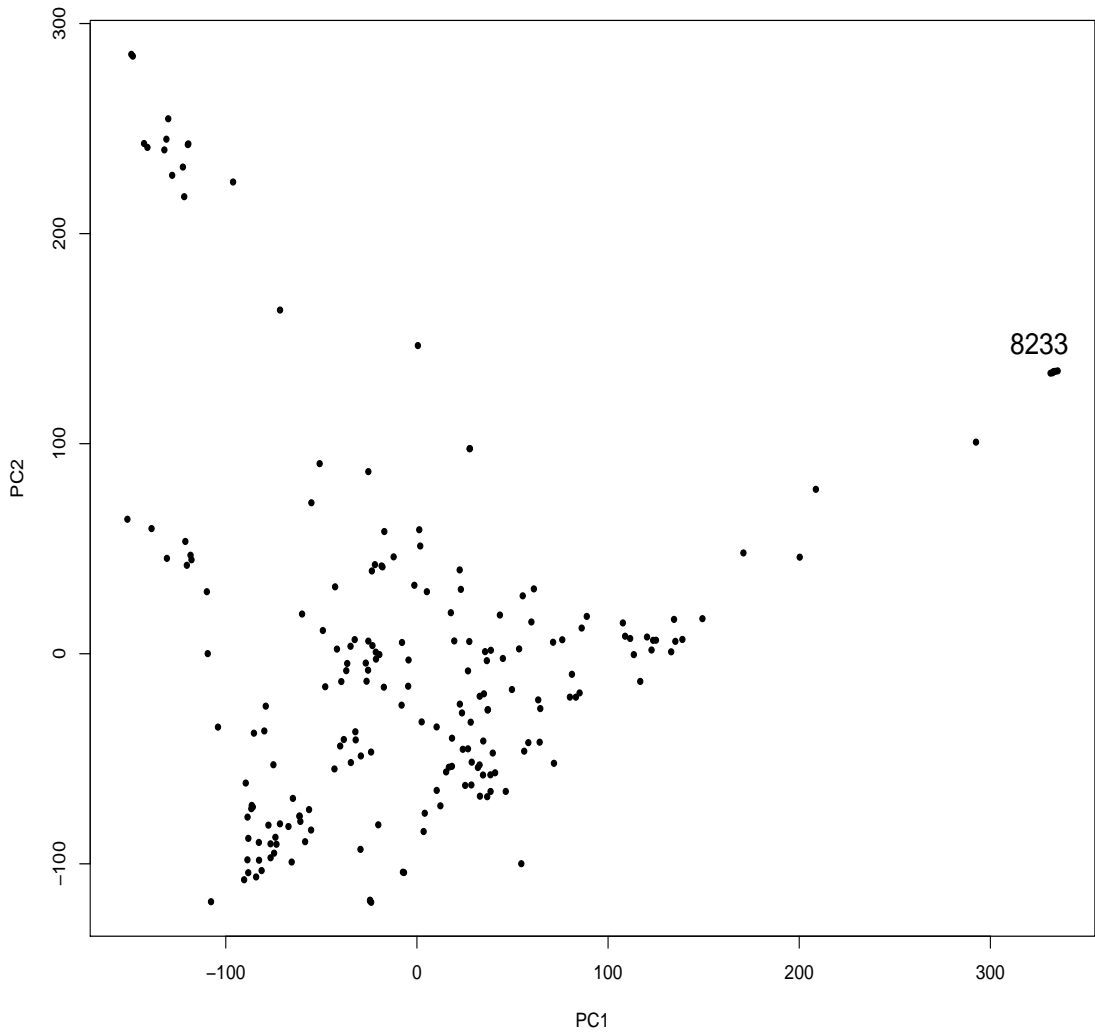

Figure S6 : The first two principal component of the genetic markers for the panel of [3], restricted for the 168 accessions for which the trait LDV was measured. On the very right are the accessions with ecotype ID's 8233, 7526 and 7515.
