# Supplementary material
Source: PubMed Central journal article supplement (PMC4317649)
Supplement: 037c01fd1def56def24d9bada05213ee_genetics.114.167916-18.pdf [file 037c01fd1def56def24d9bada05213ee_genetics.114.167916-18.pdf]

Figure S7

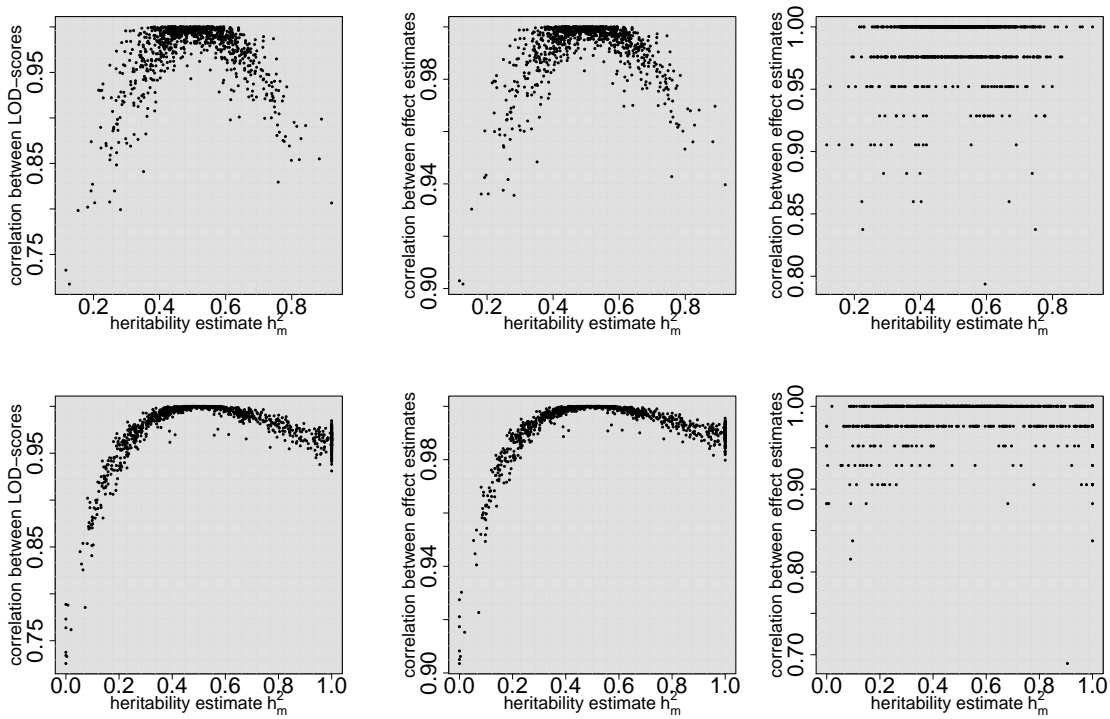

Figure S7 : **Rank correlation (Spearman  $\rho^2$ ) between effect-size estimates obtained with a one- and two-stage approach, versus the heritability estimates obtained in the two-stage approach ( $\hat{h}_m^2$ ).** 1000 traits were simulated for the Structured RegMap (first row) and the HapMap (second row), with a simulated heritability of 0.5. 10 QTLs were simulated, which explained 75% of the genetic variance. Left column: rank correlation between LOD-scores of all SNPs. Middle column: rank correlation between effect-size estimates for all SNPs. Right column: rank correlation between effect-size estimates for the 10 simulated QTLs.
