# Supplementary material
Source: PubMed Central journal article supplement (PMC4317649)
Supplement: 1272e6b42176d0133bc86ce50ef4086d_genetics.114.167916-7.pdf [file 1272e6b42176d0133bc86ce50ef4086d_genetics.114.167916-7.pdf]

---

Figure S1: histograms of the off-diagonal kinship coefficients, for 4 sub-populations of the regmap.

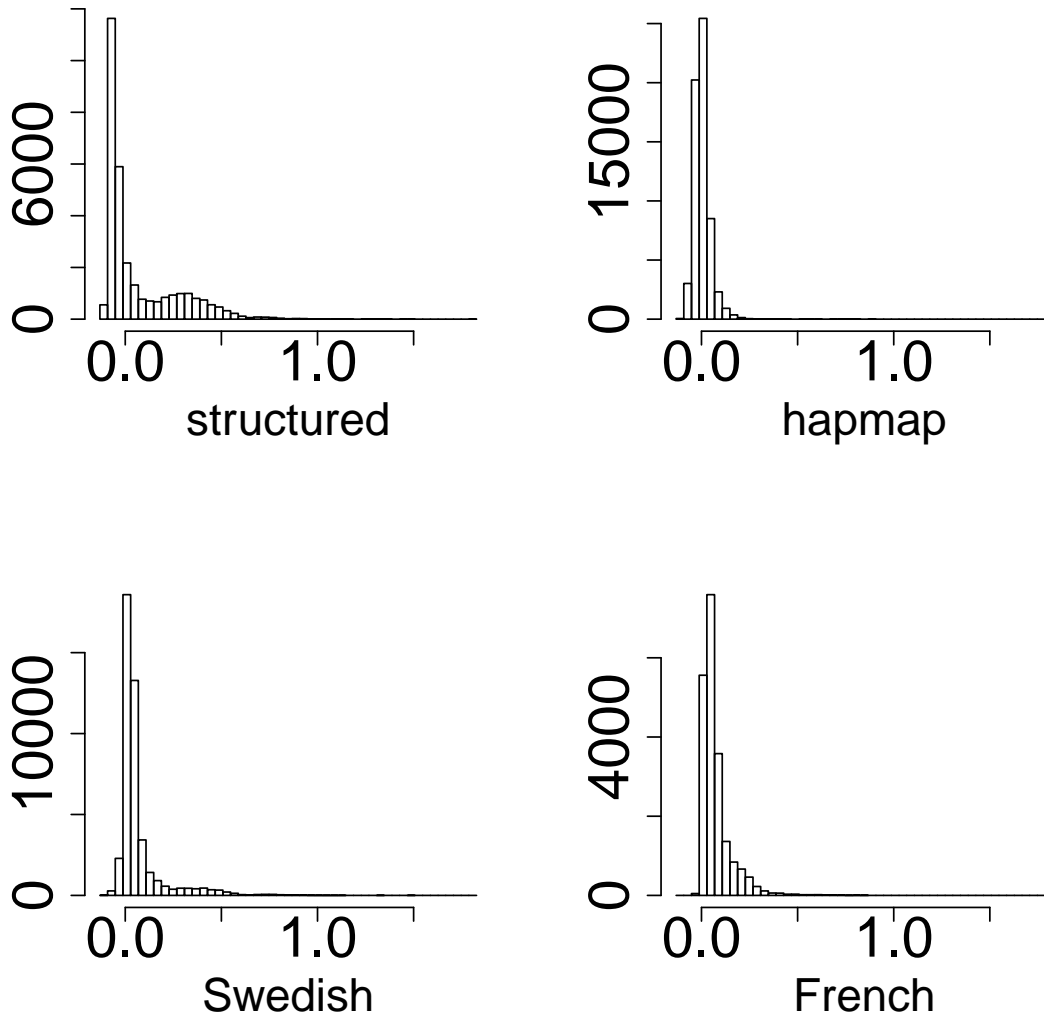

Figure S1 : Off-diagonal coefficients of the genetic relatedness matrix (equation (1) in the main text), for 4 sub-populations of the regmap.
