# Supplementary material
Source: PubMed Central journal article supplement (PMC4317649)
Supplement: 4359b414f364bdf67051949248828ce5_genetics.114.167916-13.pdf [file 4359b414f364bdf67051949248828ce5_genetics.114.167916-13.pdf]

---

## Figure S4: Monotone likelihood

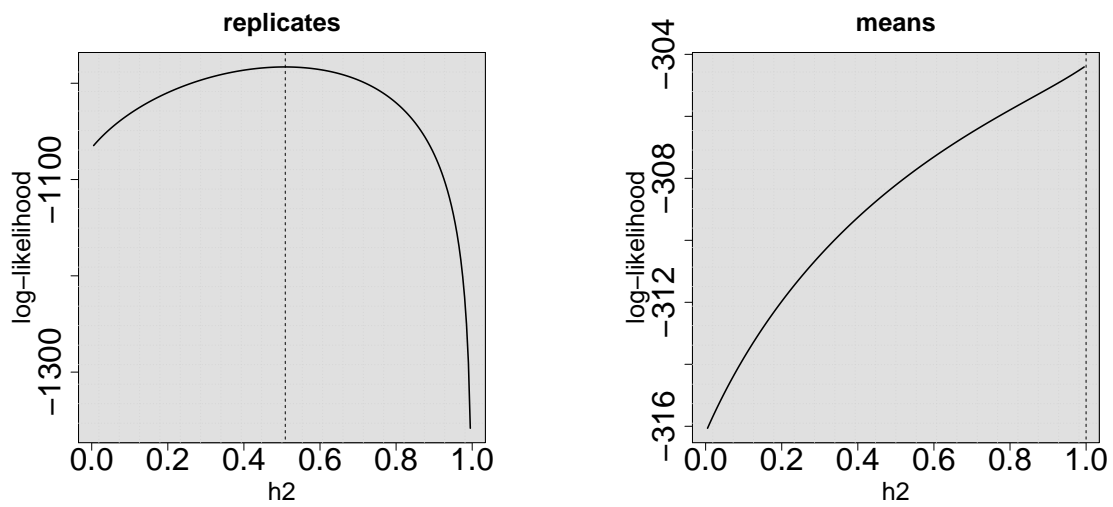

Figure S4 : **Log-likelihood as function of the heritability, for one of the 5000 simulated traits from Figure 1 (in the main text), for accessions drawn from the HapMap and a simulated heritability of 0.5** Here we choose one of the 882 traits (17.6%) for which the heritability estimate based on means ( $\hat{h}_m^2$ ) was larger than 0.99. For these traits, the heritability estimate based on replicates ( $\hat{h}_r^2$ ) was on average 0.502. For the trait shown here,  $\hat{h}_m^2 = 0.5087$  (left) and  $\hat{h}_m^2 = 0.9999$  (right).
