# Supplementary material
Source: PubMed Central journal article supplement (PMC4317649)
Supplement: 5675ee609cec6ec4b7f799bf1a797d98_genetics.114.167916-5.pdf [file 5675ee609cec6ec4b7f799bf1a797d98_genetics.114.167916-5.pdf]

---

## File S1: confidence intervals for broad-sense heritability

Confidence intervals for the broad-sense heritability estimates obtain from the ANOVA mean sums of squares are traditionally obtained from the ratio  $F = MS(G)/MS(E)$  and the quantiles of the F-distribution with the corresponding degrees of freedom. Given  $n$  genotypes with  $r_1, \dots, r_n$  replicates, the intervals are given by

$$\frac{F/F_{df1,df2,0.95} - 1}{F/F_{df1,df2,0.95} + \bar{r} - 1} < H^2 < \frac{F/F_{df1,df2,0.05} - 1}{F/F_{df1,df2,0.05} + \bar{r} - 1},$$

where  $df1 = n - 1$ ,  $df2 = \sum(r_i - 1)$  and  $\bar{r} = (n - 1)^{-1}(\sum r_i - (\sum r_i^2)/(\sum r_i))$ . In case of a balanced design with  $r_i = r$  replicates, this reduces to  $\bar{r} = r$  and  $df2 = n(r - 1)$ . See [1] (p.563) or [2].
