# Supplementary material
Source: PubMed Central journal article supplement (PMC4317649)
Supplement: 07349f3baa6267648d3401d80911af88_genetics.114.167916-8.pdf [file 07349f3baa6267648d3401d80911af88_genetics.114.167916-8.pdf]

**Table S1: ecotype-IDs of the structured regmap.**

Accession information was taken from the Bergelson lab ([http://bergelson.uchicago.edu/Members/mhorton/resources/snps/accession\\_coordinates.xls](http://bergelson.uchicago.edu/Members/mhorton/resources/snps/accession_coordinates.xls)). The following table contains geographic information for 242 of the 250 accessions from our structured regmap. Geographic information was not available for eight accessions: 6909, 8428, 5712, 6143, 5708, 5730, 5829 and 8254. Accessions were selected based on the variance of the off-diagonal kinship coefficients of each row: the accessions corresponding to the rows with the 250 highest variances were chosen.

| country                  | number of accessions |
|--------------------------|----------------------|
| Czech Republic           | 7                    |
| Finland                  | 2                    |
| France                   | 2                    |
| Ireland                  | 2                    |
| Sweden                   | 83                   |
| Tajikistan               | 3                    |
| United Kingdom           | 40                   |
| United States of America | 103                  |
| unknown                  | 8                    |

| ecotype-id | country                  | latitude | longitude | population | native-name |
|------------|--------------------------|----------|-----------|------------|-------------|
| 1716       | United States of America | 42.405   | -85.398   | Americas   | KBS-Mac-8   |
| 1718       | United States of America | 42.405   | -85.398   | Americas   | KBS-Mac-15  |
| 1719       | United States of America | 42.405   | -85.398   | Americas   | KBS-Mac-16  |
| 1722       | United States of America | 42.405   | -85.398   | Americas   | KBS-Mac-23  |
| 1724       | United States of America | 42.405   | -85.398   | Americas   | KBS-Mac-28  |
| 1726       | United States of America | 42.405   | -85.398   | Americas   | KBS-Mac-33  |
| 1729       | United States of America | 42.405   | -85.398   | Americas   | KBS-Mac-41  |
| 1730       | United States of America | 42.405   | -85.398   | Americas   | KBS-Mac-43  |
| 1733       | United States of America | 42.405   | -85.398   | Americas   | KBS-Mac-53  |
| 1736       | United States of America | 42.405   | -85.398   | Americas   | KBS-Mac-58  |
| 1738       | United States of America | 42.405   | -85.398   | Americas   | KBS-Mac-64  |
| 1740       | United States of America | 42.405   | -85.398   | Americas   | KBS-Mac-72  |
| 1743       | United States of America | 42.405   | -85.398   | Americas   | KBS-Mac-75  |
| 1744       | United States of America | 42.405   | -85.398   | Americas   | KBS-Mac-76  |
| 1745       | United States of America | 42.405   | -85.398   | Americas   | KBS-Mac-78  |
| 1749       | United States of America | 42.405   | -85.398   | Americas   | KBS-Mac-88  |
| 1750       | United States of America | 42.405   | -85.398   | Americas   | KBS-Mac-89  |
| 1751       | United States of America | 42.405   | -85.398   | Americas   | KBS-Mac-91  |
| 1752       | United States of America | 42.405   | -85.398   | Americas   | KBS-Mac-95  |
| 1753       | United States of America | 42.405   | -85.398   | Americas   | KBS-Mac-96  |
| 1782       | United States of America | 42.184   | -86.358   | Americas   | Ker-38      |
| 1829       | United States of America | 42.051   | -86.509   | Americas   | Mdn-1       |
| 1850       | United States of America | 43.595   | -86.2657  | Americas   | MNF-Pot-8   |
| 1853       | United States of America | 43.595   | -86.2657  | Americas   | MNF-Pot-21  |
| 1858       | United States of America | 43.595   | -86.2657  | Americas   | MNF-Pot-47  |
| 1864       | United States of America | 43.595   | -86.2657  | Americas   | MNF-Pot-60  |
| 1871       | United States of America | 43.595   | -86.2657  | Americas   | MNF-Pot-76  |
| 1872       | United States of America | 43.595   | -86.2657  | Americas   | MNF-Pot-75  |
| 1873       | United States of America | 43.595   | -86.2657  | Americas   | MNF-Pot-79  |
| 1874       | United States of America | 43.595   | -86.2657  | Americas   | MNF-Pot-80  |
| 1938       | United States of America | 43.5251  | -86.1843  | Americas   | MNF-Che-41  |
| 1941       | United States of America | 43.5251  | -86.1843  | Americas   | MNF-Che-45  |
| 1948       | United States of America | 43.5251  | -86.1843  | Americas   | MNF-Che-58  |

|      |                          |         |          |          |               |
|------|--------------------------|---------|----------|----------|---------------|
| 1960 | United States of America | 43.5187 | -86.1739 | Americas | MNF-Jac-22    |
| 1963 | United States of America | 43.5187 | -86.1739 | Americas | MNF-Jac-26    |
| 2057 | United States of America | 42.166  | -86.412  | Americas | Map-42        |
| 2148 | United States of America | 42.148  | -86.431  | Americas | Paw-1         |
| 2150 | United States of America | 42.148  | -86.431  | Americas | Paw-3         |
| 2157 | United States of America | 42.148  | -86.431  | Americas | Paw-11        |
| 2160 | United States of America | 42.148  | -86.431  | Americas | Paw-14        |
| 2180 | United States of America | 42.148  | -86.431  | Americas | Paw-40        |
| 2201 | United States of America | 43.7623 | -86.3929 | Americas | Pent-22       |
| 2204 | United States of America | 43.7623 | -86.3929 | Americas | Pent-30       |
| 2214 | United States of America | 43.7623 | -86.3929 | Americas | Pent-49       |
| 2274 | United States of America | 43.665  | -86.496  | Americas | SLSP-30       |
| 2280 | United States of America | 43.665  | -86.496  | Americas | SLSP-58       |
| 2294 | United States of America | 42.03   | -86.514  | Americas | Ste-9         |
| 2300 | United States of America | 42.03   | -86.514  | Americas | Ste-15        |
| 6927 | United States of America | 41.2816 | -86.621  | Americas | Kno-10        |
| 6983 | United States of America | 37.45   | -119.35  | Americas | Yo-0          |
| 7033 | United States of America | 41.3599 | -122.755 | Americas | Buckhorn Pass |
| 7515 | United States of America | 41.5609 | -86.4251 | Americas | RRS-10        |
| 7523 | United States of America | 42.0945 | -86.3253 | Americas | Pna-17        |
| 7524 | United States of America | 42.036  | -86.511  | Americas | Rmx-A02       |
| 7525 | United States of America | 42.036  | -86.511  | Americas | Rmx-A180      |
| 7526 | United States of America | 42.0945 | -86.3253 | Americas | Pna-10        |
| 7566 | United States of America | 42.093  | -86.359  | Americas | 627ME-13Y1    |
| 7578 | United States of America | 42.0945 | -86.3253 | Americas | 627PNA-1Y1    |
| 7580 | United States of America | 42.0945 | -86.3253 | Americas | 627PNA-2B3    |
| 7584 | United States of America | 42.0945 | -86.3253 | Americas | 627PNA-3M4    |
| 7787 | United States of America | 41.273  | -86.625  | Americas | KNO2.77       |
| 7837 | United States of America | 42.093  | -86.359  | Americas | ME3.41        |
| 7847 | United States of America | 42.093  | -86.359  | Americas | ME3.51        |
| 7867 | United States of America | 42.093  | -86.359  | Americas | ME4.20        |
| 8122 | United States of America | 42.036  | -86.511  | Americas | RMX3.11       |
| 8233 | United States of America | 41.1876 | -87.1923 | Americas | Dem-4         |
| 8557 | United States of America | 42.093  | -86.359  | Americas | 328ME032      |
| 8612 | United States of America | 42.093  | -86.359  | Americas | 11ME1.34      |
| 8616 | United States of America | 42.093  | -86.359  | Americas | 11ME1.41      |
| 8619 | United States of America | 42.093  | -86.359  | Americas | 11ME1.44      |
| 8629 | United States of America | 42.093  | -86.359  | Americas | 11ME2.10      |
| 8673 | United States of America | 42.0945 | -86.3253 | Americas | 328PNA032     |
| 8724 | United States of America | 42.0945 | -86.3253 | Americas | 11PNA1.15     |
| 8725 | United States of America | 42.0945 | -86.3253 | Americas | 11PNA1.4      |
| 8727 | United States of America | 42.0945 | -86.3253 | Americas | 11PNA1.6      |
| 8730 | United States of America | 42.0945 | -86.3253 | Americas | 11PNA1.9      |
| 8760 | United States of America | 42.0945 | -86.3253 | Americas | 11PNA3.19     |
| 8770 | United States of America | 42.0945 | -86.3253 | Americas | 11PNA3.65     |
| 8777 | United States of America | 42.0945 | -86.3253 | Americas | 11PNA3.75     |
| 8787 | United States of America | 42.0945 | -86.3253 | Americas | 11PNA3.86     |
| 8796 | United States of America | 42.0945 | -86.3253 | Americas | 11PNA4.101    |
| 8824 | United States of America | 42.0945 | -86.3253 | Americas | 11PNA4.129    |
| 8954 | United States of America | 42.036  | -86.511  | Americas | RMX413.1      |
| 8961 | United States of America | 42.036  | -86.511  | Americas | RMX413.16     |
| 8965 | United States of America | 42.036  | -86.511  | Americas | RMX413.2      |
| 8966 | United States of America | 42.036  | -86.511  | Americas | RMX413.20     |
| 8967 | United States of America | 42.036  | -86.511  | Americas | RMX413.21     |
| 8969 | United States of America | 42.036  | -86.511  | Americas | RMX413.24     |
| 8970 | United States of America | 42.036  | -86.511  | Americas | RMX413.25     |
| 8973 | United States of America | 42.036  | -86.511  | Americas | RMX413.29     |

|      |                          |         |          |                 |            |
|------|--------------------------|---------|----------|-----------------|------------|
| 8975 | United States of America | 42.036  | -86.511  | Americas        | RMX413.30  |
| 8976 | United States of America | 42.036  | -86.511  | Americas        | RMX413.31  |
| 8977 | United States of America | 42.036  | -86.511  | Americas        | RMX413.32  |
| 8992 | United States of America | 42.036  | -86.511  | Americas        | RMX413.48  |
| 8996 | United States of America | 42.036  | -86.511  | Americas        | RMX413.51  |
| 9001 | United States of America | 42.036  | -86.511  | Americas        | RMX413.57  |
| 9004 | United States of America | 42.036  | -86.511  | Americas        | RMX413.6   |
| 9006 | United States of America | 42.036  | -86.511  | Americas        | RMX413.62  |
| 9007 | United States of America | 42.036  | -86.511  | Americas        | RMX413.63  |
| 9012 | United States of America | 42.036  | -86.511  | Americas        | RMX413.7   |
| 9041 | United States of America | 42.039  | -86.5154 | Americas        | RMXF413.10 |
| 9045 | United States of America | 42.039  | -86.5154 | Americas        | RMXF413.15 |
| 9053 | United States of America | 42.039  | -86.5154 | Americas        | RMXF413.6  |
| 5991 | Czech Republic           | 49.4112 | 16.2815  | Austria-Hungary | DraIV 6-20 |
| 5997 | Czech Republic           | 49.4112 | 16.2815  | Austria-Hungary | DraIV 6-27 |
| 6427 | Czech Republic           | 49.3853 | 16.2544  | Austria-Hungary | ZdrI 2-1   |
| 6435 | Czech Republic           | 49.3853 | 16.2544  | Austria-Hungary | ZdrI 2-10  |
| 6444 | Czech Republic           | 49.3853 | 16.2544  | Austria-Hungary | ZdrI 2-20  |
| 6903 | Czech Republic           | 49.4013 | 16.2326  | Austria-Hungary | Bor-4      |
| 7461 | Czech Republic           | 49      | 15       | Austria-Hungary | H55        |
| 4632 | United Kingdom           | 50.4    | -4.7     | British-Isles   | UKSW06-025 |
| 4675 | United Kingdom           | 50.4    | -4.7     | British-Isles   | UKSW06-070 |
| 4862 | United Kingdom           | 50.3    | -4.9     | British-Isles   | UKSW06-262 |
| 5106 | United Kingdom           | 51.3    | 0.5      | British-Isles   | UKSE06-254 |
| 5133 | United Kingdom           | 52.2    | -1.7     | British-Isles   | UKSE06-302 |
| 5207 | United Kingdom           | 51.3    | 0.4      | British-Isles   | UKSE06-429 |
| 5232 | United Kingdom           | 51.2    | 0.4      | British-Isles   | UKSE06-466 |
| 5292 | United Kingdom           | 51.3    | 1.1      | British-Isles   | UKSE06-556 |
| 5331 | United Kingdom           | 51.1    | 0.4      | British-Isles   | UKSE06-618 |
| 5341 | United Kingdom           | 51.1    | 0.4      | British-Isles   | UKSE06-628 |
| 5380 | United Kingdom           | 54.4    | -3       | British-Isles   | UKNW06-059 |
| 5381 | United Kingdom           | 54.4    | -3       | British-Isles   | UKNW06-060 |
| 5385 | United Kingdom           | 54.4    | -3       | British-Isles   | UKNW06-078 |
| 5469 | United Kingdom           | 54.4    | -3       | British-Isles   | UKNW06-210 |
| 5582 | United Kingdom           | 54.7    | -3.4     | British-Isles   | UKNW06-410 |
| 5678 | United Kingdom           | 54.6    | -3.1     | British-Isles   | UKNW99-025 |
| 5709 | United Kingdom           | 54.6    | -2.6     | British-Isles   | UKID2      |
| 5719 | Ireland                  | 54.1335 | -6.1667  | British-Isles   | Bur-0      |
| 5720 | United Kingdom           | 53.3    | -1.6     | British-Isles   | Cal-2      |
| 5723 | United Kingdom           | 51.3    | 1        | British-Isles   | Chr-1      |
| 5724 | United Kingdom           | 51.4    | 0.1      | British-Isles   | UKID17     |
| 5731 | United Kingdom           | 54.9    | -2.9     | British-Isles   | CrI-1      |
| 5732 | United Kingdom           | 54.9    | -2.9     | British-Isles   | UKID25     |
| 5737 | United Kingdom           | 51.3    | 0.1      | British-Isles   | UKID32     |
| 5758 | United Kingdom           | 50.3    | -5.2     | British-Isles   | UKID53     |
| 5774 | United Kingdom           | 51.1    | 0.6      | British-Isles   | Sis-1      |
| 5780 | United Kingdom           | 53.1    | -1       | British-Isles   | UKID75     |
| 5788 | United Kingdom           | 50.8    | -2       | British-Isles   | UKID83     |
| 5792 | United Kingdom           | 50.8    | -0.7     | British-Isles   | UKID87     |
| 5793 | United Kingdom           | 51.3    | 0.6      | British-Isles   | UKID88     |
| 5798 | United Kingdom           | 53.1    | -3.3     | British-Isles   | UKID93     |
| 5804 | United Kingdom           | 50.8    | -1.1     | British-Isles   | UKID100    |
| 5807 | United Kingdom           | 51.8    | -0.5     | British-Isles   | UKID103    |
| 6905 | Ireland                  | 54.1    | -6.2     | British-Isles   | Bur-0      |
| 6923 | United Kingdom           | 51.4083 | -0.6383  | British-Isles   | HR-10      |
| 6924 | United Kingdom           | 51.4083 | -0.6383  | British-Isles   | HR-5       |
| 6944 | United Kingdom           | 51.4083 | -0.6383  | British-Isles   | NFA-8      |

|      |                |         |          |               |                |
|------|----------------|---------|----------|---------------|----------------|
| 7064 | United Kingdom | 51.3    | 1.1      | British-Isles | Cnt-1          |
| 7109 | United Kingdom | 51.3    | 0.5      | British-Isles | Ema-1          |
| 7483 | United Kingdom | 51.2878 | 0.0565   | British-Isles | PHW-14         |
| 9490 | United Kingdom | 55.9218 | -3.17108 | British-Isles | 02B6           |
| 9504 | United Kingdom | 55.8877 | -3.16377 | British-Isles | 12A1           |
| 6929 | Tajikistan     | 38.48   | 68.49    | Eastern-Range | Kondara        |
| 6962 | Tajikistan     | 38.35   | 68.48    | Eastern-Range | Shahdara       |
| 7168 | Tajikistan     | 38.48   | 68.49    | Eastern-Range | Hodja-Obi-Garm |
| 1247 | Sweden         | 59.4333 | 17.0167  | Fennoscandia  | Tos-31-374     |
| 1254 | Sweden         | 59.4333 | 17.0167  | Fennoscandia  | Tos-82-387     |
| 1409 | Sweden         | 62.8    | 18.2     | Fennoscandia  | Rd-38          |
| 1416 | Sweden         | 62.8    | 18.2     | Fennoscandia  | Rd-45          |
| 1435 | Sweden         | 62.8    | 18.2     | Fennoscandia  | Rd-17-319      |
| 1552 | Sweden         | 63.0833 | 18.3667  | Fennoscandia  | Sku-30         |
| 5835 | Sweden         | 63.324  | 18.484   | Fennoscandia  | Bil-3          |
| 5856 | Sweden         | 63.0167 | 17.4914  | Fennoscandia  | Dr-10          |
| 5860 | Sweden         | 62.6814 | 18.0165  | Fennoscandia  | Dra-3          |
| 6009 | Sweden         | 62.877  | 18.177   | Fennoscandia  | Eden-1         |
| 6010 | Sweden         | 62.877  | 18.177   | Fennoscandia  | Eden-5         |
| 6011 | Sweden         | 62.877  | 18.177   | Fennoscandia  | Eden-6         |
| 6012 | Sweden         | 62.877  | 18.177   | Fennoscandia  | Eden-7         |
| 6013 | Sweden         | 62.877  | 18.177   | Fennoscandia  | Eden-9         |
| 6016 | Sweden         | 62.9    | 18.4     | Fennoscandia  | Eds-1          |
| 6017 | Sweden         | 62.9    | 18.4     | Fennoscandia  | Eds-9          |
| 6024 | Sweden         | 55.7509 | 13.3712  | Fennoscandia  | Fly2-2         |
| 6025 | Sweden         | 62.6437 | 17.7339  | Fennoscandia  | Gro-3          |
| 6030 | Sweden         | 62.806  | 18.1896  | Fennoscandia  | Grn-5          |
| 6043 | Sweden         | 62.801  | 18.079   | Fennoscandia  | Lv-1           |
| 6046 | Sweden         | 62.801  | 18.079   | Fennoscandia  | Lv-5           |
| 6064 | Sweden         | 62.9513 | 18.2763  | Fennoscandia  | Nyl-2          |
| 6069 | Sweden         | 62.9513 | 18.2763  | Fennoscandia  | Nyl-7          |
| 6071 | Sweden         | 62.9308 | 18.3448  | Fennoscandia  | Omn-5          |
| 6077 | Sweden         | 55.6942 | 13.4504  | Fennoscandia  | Rev-3          |
| 6091 | Sweden         | 55.6525 | 13.215   | Fennoscandia  | T1010          |
| 6104 | Sweden         | 55.7    | 13.2     | Fennoscandia  | T1160          |
| 6118 | Sweden         | 55.7    | 13.2     | Fennoscandia  | T610           |
| 6154 | Sweden         | 62.6422 | 17.7406  | Fennoscandia  | TAA 04         |
| 6163 | Sweden         | 62.6425 | 17.7356  | Fennoscandia  | TAA 14         |
| 6166 | Sweden         | 62.6425 | 17.7372  | Fennoscandia  | TAA 17         |
| 6169 | Sweden         | 62.8714 | 18.3447  | Fennoscandia  | TD 01          |
| 6170 | Sweden         | 62.8717 | 18.3442  | Fennoscandia  | TD 02          |
| 6171 | Sweden         | 62.8717 | 18.3444  | Fennoscandia  | TD 03          |
| 6172 | Sweden         | 62.8717 | 18.3436  | Fennoscandia  | TD 04          |
| 6173 | Sweden         | 62.8717 | 18.3419  | Fennoscandia  | TD 05          |
| 6174 | Sweden         | 62.8719 | 18.3422  | Fennoscandia  | TD 06          |
| 6177 | Sweden         | 62.6322 | 17.69    | Fennoscandia  | TL 03          |
| 6180 | Sweden         | 62.6322 | 17.6906  | Fennoscandia  | TL 07          |
| 6184 | Sweden         | 62.8892 | 18.4522  | Fennoscandia  | TB 01          |
| 6209 | Sweden         | 62.8836 | 18.1842  | Fennoscandia  | TEDEN 02       |
| 6210 | Sweden         | 62.8839 | 18.1836  | Fennoscandia  | TEDEN 03       |
| 6212 | Sweden         | 63.0175 | 18.3239  | Fennoscandia  | TF 02          |
| 6214 | Sweden         | 63.0175 | 18.3281  | Fennoscandia  | TF 04          |
| 6215 | Sweden         | 63.0172 | 18.3281  | Fennoscandia  | TF 05          |
| 6216 | Sweden         | 63.0167 | 18.3283  | Fennoscandia  | TF 06          |
| 6217 | Sweden         | 63.0169 | 18.3283  | Fennoscandia  | TF 07          |
| 6218 | Sweden         | 63.0172 | 18.3283  | Fennoscandia  | TF 08          |
| 6220 | Sweden         | 62.806  | 18.1896  | Fennoscandia  | TGR 01         |

|      |         |         |         |              |         |
|------|---------|---------|---------|--------------|---------|
| 6221 | Sweden  | 62.806  | 18.1896 | Fennoscandia | TGR 02  |
| 6226 | Sweden  | 62.7994 | 17.9033 | Fennoscandia | TH 08   |
| 6231 | Sweden  | 62.96   | 18.2844 | Fennoscandia | TNY 04  |
| 6235 | Sweden  | 62.9611 | 18.3589 | Fennoscandia | TOM 01  |
| 6236 | Sweden  | 62.9617 | 18.36   | Fennoscandia | TOM 02  |
| 6237 | Sweden  | 62.9619 | 18.35   | Fennoscandia | TOM 03  |
| 6238 | Sweden  | 62.9619 | 18.35   | Fennoscandia | TOM 04  |
| 6240 | Sweden  | 62.9622 | 18.35   | Fennoscandia | TOM 06  |
| 6241 | Sweden  | 62.9614 | 18.3608 | Fennoscandia | TOM 07  |
| 6244 | Sweden  | 62.9169 | 18.4728 | Fennoscandia | TR 01   |
| 6900 | Sweden  | 63.324  | 18.484  | Fennoscandia | Bil-5   |
| 6901 | Sweden  | 63.324  | 18.484  | Fennoscandia | Bil-7   |
| 6913 | Sweden  | 62.877  | 18.177  | Fennoscandia | Eden-2  |
| 6917 | Sweden  | 63.0165 | 18.3174 | Fennoscandia | Fb-2    |
| 6918 | Sweden  | 63.0165 | 18.3174 | Fennoscandia | Fb-4    |
| 6968 | Finland | 60      | 23.5    | Fennoscandia | Tamm-2  |
| 6969 | Finland | 60      | 23.5    | Fennoscandia | Tamm-27 |
| 8218 | Sweden  | 62.877  | 18.177  | Fennoscandia | Eden-4  |
| 8227 | Sweden  | 62.7989 | 17.9103 | Fennoscandia | TH 03   |
| 8335 | Sweden  | 55.71   | 13.2    | Fennoscandia | Lund    |
| 8376 | Sweden  | 62.69   | 18      | Fennoscandia | Sanna-2 |
| 9321 | Sweden  | 62.8622 | 18.336  | Fennoscandia | dal 1   |
| 9323 | Sweden  | 62.8622 | 18.336  | Fennoscandia | dal 3   |
| 9332 | Sweden  | 62.8698 | 18.381  | Fennoscandia | Bar 1   |
| 9354 | Sweden  | 62.8762 | 18.1746 | Fennoscandia | Eden 15 |
| 9355 | Sweden  | 62.8762 | 18.1746 | Fennoscandia | Eden 16 |
| 9356 | Sweden  | 62.8762 | 18.1746 | Fennoscandia | Eden 17 |
| 9363 | Sweden  | 62.9147 | 18.4045 | Fennoscandia | EdJ 2   |
| 9371 | Sweden  | 63.016  | 18.3175 | Fennoscandia | FL 1    |
| 9378 | Sweden  | 63.0165 | 18.3174 | Fennoscandia | FU 4    |
| 9386 | Sweden  | 62.806  | 18.1896 | Fennoscandia | Grn 12  |
| 9388 | Sweden  | 62.806  | 18.1896 | Fennoscandia | Grn 14  |
| 9427 | Sweden  | 62.8815 | 18.4055 | Fennoscandia | Ns 2    |
| 9433 | Sweden  | 62.9513 | 18.2763 | Fennoscandia | Nyl 13  |
| 9434 | Sweden  | 62.8959 | 18.3659 | Fennoscandia | de 2    |
| 9471 | Sweden  | 56.0648 | 13.9707 | Fennoscandia | Ulla 1  |
| 171  | France  | 47.3833 | 5.31667 | France       | MIB-20  |
| 228  | France  | 47.3833 | 5.31667 | France       | MIB-9   |
