# Supplementary material
Source: PubMed Central journal article supplement (PMC4317649)
Supplement: b50d34cc57261a8c53d3dab11b216ce9_genetics.114.167916-16.pdf [file b50d34cc57261a8c53d3dab11b216ce9_genetics.114.167916-16.pdf]

## Table S2

Table S2 : **Comparison of the marker-based estimators heritability estimators  $h_r^2$  and  $h_m^2$  for simulated data.** We simulated 5000 traits, for random samples of 200 accessions drawn from Swedish and French regmap. 20 unlinked QTLs were simulated, which explained 50 percent of the genetic variance. The simulated heritability was 0.2, 0.5 and 0.8. Standard errors are given relative to those of the broad sense heritability estimator ( $H^2$ ).

|                        | bias     | standard error | relative standard error |
|------------------------|----------|----------------|-------------------------|
| Swedish regmap         |          |                |                         |
| $h^2 = 0.2$            |          |                |                         |
| broad-sense ( $H^2$ )  | -0.00162 | 0.05227        | 1.00000                 |
| replicates ( $h_r^2$ ) | -0.00109 | 0.04991        | 0.95498                 |
| means ( $h_m^2$ )      | 0.01302  | 0.11018        | 2.10798                 |
| $h^2 = 0.5$            |          |                |                         |
| broad-sense ( $H^2$ )  | -0.00403 | 0.05373        | 1.00000                 |
| replicates ( $h_r^2$ ) | -0.00173 | 0.04506        | 0.83860                 |
| means ( $h_m^2$ )      | 0.01494  | 0.16662        | 3.10123                 |
| $h^2 = 0.8$            |          |                |                         |
| broad-sense ( $H^2$ )  | -0.00458 | 0.03130        | 1.00000                 |
| replicates ( $h_r^2$ ) | -0.00180 | 0.02319        | 0.74095                 |
| means ( $h_m^2$ )      | -0.00104 | 0.16227        | 5.18435                 |
| French regmap          |          |                |                         |
| $h^2 = 0.2$            |          |                |                         |
| broad-sense ( $H^2$ )  | -0.00183 | 0.04958        | 1.00000                 |
| replicates ( $h_r^2$ ) | -0.00196 | 0.04780        | 0.96421                 |
| means ( $h_m^2$ )      | 0.01306  | 0.12049        | 2.43043                 |
| $h^2 = 0.5$            |          |                |                         |
| broad-sense ( $H^2$ )  | -0.00396 | 0.04930        | 1.00000                 |
| replicates ( $h_r^2$ ) | -0.00396 | 0.04409        | 0.89431                 |
| means ( $h_m^2$ )      | 0.01952  | 0.17547        | 3.55941                 |
| $h^2 = 0.8$            |          |                |                         |
| broad-sense ( $H^2$ )  | -0.00341 | 0.02808        | 1.00000                 |
| replicates ( $h_r^2$ ) | -0.00236 | 0.02246        | 0.79988                 |
| means ( $h_m^2$ )      | 0.00202  | 0.16461        | 5.86175                 |
