# Supplementary material
Source: PubMed Central journal article supplement (PMC4317649)
Supplement: e5fea68349b5310646c53489d4814bfe_genetics.114.167916-12.pdf [file e5fea68349b5310646c53489d4814bfe_genetics.114.167916-12.pdf]

---

## Table S4

Table S4: : **Heritability estimates and confidence intervals, for two flowering traits from [3] and four traits measured in new experiments (trait abbreviations given in Table 1 of the main text).**

| trait | replicates          | means               | broad-sense         |
|-------|---------------------|---------------------|---------------------|
| LDV   | 0.829 (0.791,0.861) | 0.631 (0.199,0.922) | 0.858 (0.827,0.885) |
| LD    | 0.946 (0.933,0.957) | 1.000 (0.000,1.000) | 0.966 (0.958,0.973) |
| LA(S) | 0.216 (0.153,0.297) | 0.150 (0.040,0.424) | 0.235 (0.167,0.306) |
| LA(H) | 0.380 (0.319,0.445) | 0.340 (0.090,0.729) | 0.388 (0.327,0.451) |
| BT    | 0.948 (0.937,0.956) | 1.000 (0.000,1.000) | 0.956 (0.947,0.963) |
| LW    | 0.535 (0.473,0.596) | 0.202 (0.029,0.682) | 0.530 (0.468,0.589) |

Three estimators were used: mixed model based on replicates ( $\hat{h}_r^2$ ), mixed model based on genotypic means ( $\hat{h}_m^2$ ), and the usual ANOVA-based broad-sense heritability estimator ( $\hat{H}^2$ ). An LD-adjusted kinship matrix was used in the mixed model for  $\hat{h}_r^2$  and  $\hat{h}_m^2$ .

The LD-adjusted kinship matrix was computed using version 2.0 of the LDAK-software [12], available at <http://dougspeed.com/ldak/>. We used sections of 1000 SNPs, with a buffer of 200. The maximum distance considered for LD was 250kb; the 'half-life' parameter (modeling LD-decay) was set to 20kb.
