# Supplementary material
Source: PubMed Central journal article supplement (PMC4317649)
Supplement: ebf98871ef80ad4827f94773c63ac7e3_genetics.114.167916-1.pdf [file ebf98871ef80ad4827f94773c63ac7e3_genetics.114.167916-1.pdf]

## Table S5

In the following tables, the second and third column contain the percentage of the 5000 traits for which the corresponding heritability estimates ( $\hat{h}_r^2$  and  $\hat{h}_m^2$ ) were contained in the intervals in the first column. The remaining columns show the correlation ( $r$ ) between simulated and predicted genetic effects, averaged over these traits. 20 QTLs were simulated, which explained 50 percent of the genetic variance. Each trait was simulated for a randomly drawn training (200 accessions) and validation set (50 accessions). Genetic effects were predicted using G-BLUP, based on either a mixed model for the individual plants (replicates) or for the genotypic means.

Table S5(a) : **Prediction accuracy ( $r$ ) of G-BLUP for 5000 simulated traits, for the structured regmap population, and a simulated heritability of 0.2.**

| interval   | $\hat{h}_r^2$ | $\hat{h}_m^2$ | $r$ (replicates)<br>Training set | $r$ (means)<br>Training set | $r$ (replicates)<br>Validation set | $r$ (means)<br>Validation set |
|------------|---------------|---------------|----------------------------------|-----------------------------|------------------------------------|-------------------------------|
| [0, 0.1)   | 3.08 %        | 9.88 %        | 0.637                            | 0.654                       | 0.216                              | 0.218                         |
| [0.1, 0.3) | 93.96 %       | 76.38 %       | 0.770                            | 0.770                       | 0.280                              | 0.279                         |
| [0.3, 0.5) | 2.96 %        | 13.52 %       | 0.816                            | 0.803                       | 0.325                              | 0.313                         |
| [0.5, 0.7) | 0 %           | 0.22 %        |                                  | 0.782                       |                                    | 0.287                         |
| [0.7, 0.9) | 0 %           | 0 %           |                                  |                             |                                    |                               |
| [0.9, 1]   | 0 %           | 0 %           |                                  |                             |                                    |                               |
| [0, 1]     | 100 %         | 100 %         | 0.767                            | 0.763                       | 0.279                              | 0.278                         |

Table S5(b) : **Prediction accuracy ( $r$ ) of G-BLUP for 5000 simulated traits, for the structured regmap population and a simulated heritability of 0.5.**

| interval   | $\hat{h}_r^2$ | $\hat{h}_m^2$ | $r$ (replicates)<br>Training set | $r$ (means)<br>Training set | $r$ (replicates)<br>Validation set | $r$ (means)<br>Validation set |
|------------|---------------|---------------|----------------------------------|-----------------------------|------------------------------------|-------------------------------|
| [0, 0.1)   | 0 %           | 0.04 %        |                                  | 0.709                       |                                    | 0.328                         |
| [0.1, 0.3) | 0 %           | 5.24 %        |                                  | 0.836                       |                                    | 0.269                         |
| [0.3, 0.5) | 51.42 %       | 46.54 %       | 0.886                            | 0.887                       | 0.302                              | 0.300                         |
| [0.5, 0.7) | 48.58 %       | 42.12 %       | 0.905                            | 0.903                       | 0.333                              | 0.337                         |
| [0.7, 0.9) | 0 %           | 5.84 %        |                                  | 0.905                       |                                    | 0.343                         |
| [0.9, 1]   | 0 %           | 0.22 %        |                                  | 0.888                       |                                    | 0.386                         |
| [0, 1]     | 100 %         | 100 %         | 0.895                            | 0.892                       | 0.317                              | 0.317                         |

Table S5(c) : **Prediction accuracy ( $r$ ) of G-BLUP for 5000 simulated traits, for the structured regmap population and a simulated heritability of 0.8.**

| interval   | $\hat{h}_r^2$ | $\hat{h}_m^2$ | $r$ (replicates)<br>Training set | $r$ (means)<br>Training set | $r$ (replicates)<br>Validation set | $r$ (means)<br>Validation set |
|------------|---------------|---------------|----------------------------------|-----------------------------|------------------------------------|-------------------------------|
| [0, 0.1)   | 0 %           | 0 %           |                                  |                             |                                    |                               |
| [0.1, 0.3) | 0 %           | 0.02 %        |                                  | 0.877                       |                                    | 0.299                         |
| [0.3, 0.5) | 0 %           | 1.42 %        |                                  | 0.930                       |                                    | 0.283                         |
| [0.5, 0.7) | 0.04 %        | 19.26 %       | 0.953                            | 0.955                       | 0.400                              | 0.318                         |
| [0.7, 0.9) | 99.96 %       | 59.26 %       | 0.964                            | 0.964                       | 0.343                              | 0.344                         |
| [0.9, 1]   | 0 %           | 20.04 %       |                                  | 0.965                       |                                    | 0.365                         |
| [0, 1]     | 100 %         | 100 %         | 0.964                            | 0.962                       | 0.343                              | 0.343                         |

Table S5(d) : **Prediction accuracy ( $r$ ) of G-BLUP for 5000 simulated traits, for the HapMap population and a simulated heritability of 0.2.**

| interval   | $\hat{h}_r^2$ | $\hat{h}_m^2$ | $r$ (replicates)<br>Training set | $r$ (means)<br>Training set | $r$ (replicates)<br>Validation set | $r$ (means)<br>Validation set |
|------------|---------------|---------------|----------------------------------|-----------------------------|------------------------------------|-------------------------------|
| [0, 0.1)   | 1.74 %        | 28.64 %       | 0.616                            | 0.632                       | 0.259                              | 0.273                         |
| [0.1, 0.3) | 96.7 %        | 40.7 %        | 0.673                            | 0.674                       | 0.341                              | 0.348                         |
| [0.3, 0.5) | 1.56 %        | 17.8 %        | 0.711                            | 0.684                       | 0.364                              | 0.382                         |
| [0.5, 0.7) | 0 %           | 5.8 %         |                                  | 0.681                       |                                    | 0.366                         |
| [0.7, 0.9) | 0 %           | 2.84 %        |                                  | 0.675                       |                                    | 0.370                         |
| [0.9, 1]   | 0 %           | 4.22 %        |                                  | 0.669                       |                                    | 0.357                         |
| [0, 1]     | 100 %         | 100 %         | 0.672                            | 0.664                       | 0.340                              | 0.335                         |

Table S5(e) : **Prediction accuracy ( $r$ ) of G-BLUP for 5000 simulated traits, for the HapMap population and a simulated heritability of 0.5.**

| interval   | $\hat{h}_r^2$ | $\hat{h}_m^2$ | $r$ (replicates)<br>Training set | $r$ (means)<br>Training set | $r$ (replicates)<br>Validation set | $r$ (means)<br>Validation set |
|------------|---------------|---------------|----------------------------------|-----------------------------|------------------------------------|-------------------------------|
| [0, 0.1)   | 0 %           | 6 %           |                                  | 0.811                       |                                    | 0.285                         |
| [0.1, 0.3) | 0 %           | 21.02 %       |                                  | 0.851                       |                                    | 0.366                         |
| [0.3, 0.5) | 51.78 %       | 22.56 %       | 0.862                            | 0.867                       | 0.395                              | 0.413                         |
| [0.5, 0.7) | 48.22 %       | 17.5 %        | 0.877                            | 0.871                       | 0.416                              | 0.428                         |
| [0.7, 0.9) | 0 %           | 10.86 %       |                                  | 0.873                       |                                    | 0.426                         |
| [0.9, 1]   | 0 %           | 22.06 %       |                                  | 0.871                       |                                    | 0.422                         |
| [0, 1]     | 100 %         | 100 %         | 0.869                            | 0.863                       | 0.405                              | 0.401                         |

Table S5(f) (given as Table 6 in the main text) : **Prediction accuracy ( $r$ ) of G-BLUP for 5000 simulated traits, for the HapMap population and a simulated heritability of 0.8.**

| interval   | $\hat{h}_r^2$ | $\hat{h}_m^2$ | $r$ (replicates)<br>Training set | $r$ (means)<br>Training set | $r$ (replicates)<br>Validation set | $r$ (means)<br>Validation set |
|------------|---------------|---------------|----------------------------------|-----------------------------|------------------------------------|-------------------------------|
| [0, 0.1)   | 0 %           | 2.58 %        |                                  | 0.890                       |                                    | 0.289                         |
| [0.1, 0.3) | 0 %           | 8.34 %        |                                  | 0.937                       |                                    | 0.373                         |
| [0.3, 0.5) | 0 %           | 12.34 %       |                                  | 0.954                       |                                    | 0.409                         |
| [0.5, 0.7) | 0.04 %        | 15.9 %        | 0.942                            | 0.959                       | 0.208                              | 0.423                         |
| [0.7, 0.9) | 99.96 %       | 15.62 %       | 0.961                            | 0.961                       | 0.431                              | 0.443                         |
| [0.9, 1]   | 0 %           | 45.22 %       |                                  | 0.961                       |                                    | 0.448                         |
| [0, 1]     | 100 %         | 100 %         | 0.961                            | 0.956                       | 0.431                              | 0.428                         |
