# Supplementary material
Source: PubMed Central journal article supplement (PMC4317649)
Supplement: fb523923a36b813b19c59ef199c51e02_genetics.114.167916-2.pdf [file fb523923a36b813b19c59ef199c51e02_genetics.114.167916-2.pdf]

## File S3: the likelihood is constant for a kinship matrix with compound symmetry structure

Mixed model based estimation of heritability using genotypic means may become problematic when the sample size is small and the kinship matrix is close to compound symmetry, i.e. the structure where all off-diagonal elements are equal. Here we show that in the case the kinship matrix is exactly compound symmetry, the likelihood is constant in  $\eta = \sigma_E^2/\sigma_A^2$ . We use the notation  $\eta$  to avoid confusion with  $\delta = \sigma_A^2/\sigma_E^2$ , used in our results on genomic prediction. We write  $\mathbf{1}_n$  for the  $n \times 1$  column vector of ones, and  $I_n$  for the  $n$ -dimensional identity matrix. Finally, let  $J_n$  be the  $n \times n$  matrix of ones.

Suppose that  $K = I_n + aJ_n$ , for some  $a > 0$ . The key observation is that the covariance matrix of the data can be written as

$$\Sigma = \sigma_A^2 K + \sigma_E^2 I_n = \tilde{\sigma}_A^2 \tilde{K} + \tilde{\sigma}_E^2 I_n = \tilde{\sigma}_A^2 (\tilde{K} + \tilde{\eta} I_n),$$

where  $\tilde{\sigma}_A^2 = \sigma_A^2$ ,  $\tilde{\sigma}_E^2 = \sigma_A^2 + \sigma_E^2$ ,  $\tilde{K} = aJ_n = a\mathbf{1}_n\mathbf{1}_n^t$  and  $\tilde{\eta} = (\sigma_A^2 + \sigma_E^2)/\sigma_A^2 > 0$ . We can then directly apply the results in section 3 of [5], with (in their notation)  $k = 1$ ,  $d = 1$  and  $X = \mathbf{1}_n$  (we only include an intercept, and no marker effect), and replacing  $\sigma_A^2$ ,  $\sigma_E^2$ ,  $\eta$  and  $K$  by respectively  $\tilde{\sigma}_A^2$ ,  $\tilde{\sigma}_E^2$ ,  $\tilde{\eta}$  and  $\tilde{K}$ . In particular, we have the spectral decomposition

$$\begin{aligned} \tilde{K} &= USU^t = [U_1, U_2] \begin{bmatrix} S_1 & 0 \\ 0 & S_2 \end{bmatrix} [U_1, U_2]^t \\ &= \begin{pmatrix} n^{-\frac{1}{2}} & 0 & \dots & 0 \\ \vdots & \vdots & & \vdots \\ n^{-\frac{1}{2}} & 0 & \dots & 0 \end{pmatrix} \begin{pmatrix} na & 0 & \dots & 0 \\ 0 & 0 & \dots & 0 \\ \vdots & & \ddots & \vdots \\ 0 & \dots & \dots & 0 \end{pmatrix} \begin{pmatrix} n^{-\frac{1}{2}} & \dots & n^{-\frac{1}{2}} \\ 0 & \dots & 0 \\ 0 & \dots & 0 \end{pmatrix}, \end{aligned}$$

i.e. the only non-zero eigenvalue of  $\tilde{K}$  is  $an$ , with eigenvector  $(n^{-\frac{1}{2}}, \dots, n^{-\frac{1}{2}})$ .

For this choice of  $X$  and  $\tilde{K}$ , the expressions for the (RE)ML estimates of  $\beta$  and  $\tilde{\sigma}_A^2$  given in sections 3.2 and 4 of [5] greatly simplify:  $\hat{\beta} = \bar{y}$  and the REML-estimate of  $\tilde{\sigma}_A^2$  is  $\sum_{i=1}^n (y_i - \bar{y})^2 / (\tilde{\eta}(n-1))$ . The extra terms

$$\frac{1}{2} \left( d \log(2\pi\tilde{\sigma}_A^2) + \log |X^t X| - \log |X^t (\tilde{K} + \tilde{\eta} I_n)^{-1} X| \right)$$

in the REML-log-likelihood (see the first equation in section 4 of [5]), now equal

$$\frac{1}{2} \left( d \log(2\pi\tilde{\sigma}_A^2) + \log n - \log \left( \frac{n}{na + \tilde{\eta}} \right) \right).$$

Combining this with their equation (3.7), it follows that the REML-log-likelihood is constant in  $\tilde{\eta} = (\sigma_A^2 + \sigma_E^2)/\sigma_A^2 > 0$ , and hence also constant in  $\eta = \tilde{\eta} - 1 = \sigma_E^2/\sigma_A^2$ .
